# Supplementary material for: Trust but verify: Is there a role for active surveillance in monitoring adverse events in Zimbabwe’s large-scale male circumcision program?
Source: PubMed Central journal article supplement (PMC6557516; doi:10.1371/journal.pone.0218137), 2019-06-10
Supplement: pone.0218137.s001.pdf [file pone.0218137.s001.pdf]

**Prospective Activity: AE Review Form – client VMMC follow-up review**

Site name \_\_\_\_\_ Date \_\_\_\_\_ Site type:    Outreach    Mobile    Static

Reviewer \_\_\_\_\_ Dates of in-person reviews observed \_\_\_\_\_ Cadre of person observed:    nurse    doctor

| VMMC follow-up reviews               | Client order |              |              |              |              |              |              |              |              |              |              |              |              |              |              |              |              |              |              |              |              |              |              |              |    |
|--------------------------------------|--------------|--------------|--------------|--------------|--------------|--------------|--------------|--------------|--------------|--------------|--------------|--------------|--------------|--------------|--------------|--------------|--------------|--------------|--------------|--------------|--------------|--------------|--------------|--------------|----|
|                                      | 1            | 2            | 3            | 4            | 5            | 6            | 7            | 8            | 9            | 10           | 11           | 12           | 13           | 14           | 15           | 16           | 17           | 18           | 19           | 20           | 21           | 22           | 23           | 24           | 25 |
| <b>Client review characteristics</b> |              |              |              |              |              |              |              |              |              |              |              |              |              |              |              |              |              |              |              |              |              |              |              |              |    |
| Review Day                           | 2<br>7<br>14 | 2<br>7<br>14 | 2<br>7<br>14 | 2<br>7<br>14 | 2<br>7<br>14 | 2<br>7<br>14 | 2<br>7<br>14 | 2<br>7<br>14 | 2<br>7<br>14 | 2<br>7<br>14 | 2<br>7<br>14 | 2<br>7<br>14 | 2<br>7<br>14 | 2<br>7<br>14 | 2<br>7<br>14 | 2<br>7<br>14 | 2<br>7<br>14 | 2<br>7<br>14 | 2<br>7<br>14 | 2<br>7<br>14 | 2<br>7<br>14 | 2<br>7<br>14 | 2<br>7<br>14 | 2<br>7<br>14 |    |
| AE identified by site staff          | Y<br>N       |              |              |              |              |              |              |              |              |              |              |              |              |              |              |              |              |              |              |              |              |              |              |              |    |
| Actual AE present                    | Y<br>N       |              |              |              |              |              |              |              |              |              |              |              |              |              |              |              |              |              |              |              |              |              |              |              |    |
| AE type identified correctly         | Y<br>N       |              |              |              |              |              |              |              |              |              |              |              |              |              |              |              |              |              |              |              |              |              |              |              |    |
| AE severity identified correctly     | Y<br>N       |              |              |              |              |              |              |              |              |              |              |              |              |              |              |              |              |              |              |              |              |              |              |              |    |
| AE reviewed with staff               | Y<br>N       |              |              |              |              |              |              |              |              |              |              |              |              |              |              |              |              |              |              |              |              |              |              |              |    |

TOTAL NUMBER OF AEs IDENTIFIED BY SITE STAFF: \_\_\_\_\_ TOTAL NUMBER OF AEs IDENTIFIED BY ZAZIC STAFF \_\_\_\_\_

Notes \_\_\_\_\_  
 \_\_\_\_\_  
 \_\_\_\_\_

**Site team QA representative signature** \_\_\_\_\_

**Retrospective AE Review Form – Register Data Review - July-December 2016**

Site name \_\_\_\_\_ Date \_\_\_\_\_ Site type:    Outreach    Mobile    Static

Reviewer \_\_\_\_\_ Month(s) of reviewed data \_\_\_\_\_ Register pages reviewed: \_\_\_\_\_

Site team QA representative signature \_\_\_\_\_

| VMMC procedure characteristics                                                                 | VMMC register <b>PAGE</b> reviewed (check if complete. Leave BLANK if incomplete or incorrect) |   |   |   |   |   |   |   |   |    |    |    |    |    |    |    |    |    |    |    |    |    |    |    |    |
|------------------------------------------------------------------------------------------------|------------------------------------------------------------------------------------------------|---|---|---|---|---|---|---|---|----|----|----|----|----|----|----|----|----|----|----|----|----|----|----|----|
|                                                                                                | 1                                                                                              | 2 | 3 | 4 | 5 | 6 | 7 | 8 | 9 | 10 | 11 | 12 | 13 | 14 | 15 | 16 | 17 | 18 | 19 | 20 | 21 | 22 | 23 | 24 | 25 |
| <b>VMMC Register</b>                                                                           |                                                                                                |   |   |   |   |   |   |   |   |    |    |    |    |    |    |    |    |    |    |    |    |    |    |    |    |
| Adverse event section complete - Day of Procedure (severity + code)                            |                                                                                                |   |   |   |   |   |   |   |   |    |    |    |    |    |    |    |    |    |    |    |    |    |    |    |    |
| 1 <sup>st</sup> post-procedure review AE section complete (Day 2 or Day 7) (severity + code)   |                                                                                                |   |   |   |   |   |   |   |   |    |    |    |    |    |    |    |    |    |    |    |    |    |    |    |    |
| 2 <sup>nd</sup> post-procedure review AE section complete (Day 7 or Day 14) (severity + code)  |                                                                                                |   |   |   |   |   |   |   |   |    |    |    |    |    |    |    |    |    |    |    |    |    |    |    |    |
| 3 <sup>rd</sup> post-procedure review AE section complete (Day 42 or Day 49) (severity + code) |                                                                                                |   |   |   |   |   |   |   |   |    |    |    |    |    |    |    |    |    |    |    |    |    |    |    |    |
| Additional post-procedure review AE section complete (if applicable) (severity + code)         |                                                                                                |   |   |   |   |   |   |   |   |    |    |    |    |    |    |    |    |    |    |    |    |    |    |    |    |
| Comments completed – if applicable                                                             |                                                                                                |   |   |   |   |   |   |   |   |    |    |    |    |    |    |    |    |    |    |    |    |    |    |    |    |

**IN THE PAST 3 MONTHS:**

TOTAL NUMBER OF AEs IDENTIFIED FROM DATA: \_\_\_\_\_ TOTAL NUMBER OF AEs REPORTED ON MRF TO PARTNER: \_\_\_\_\_ TOTAL NUMBER OF AEs IN DHIS2: \_\_\_\_\_ : \_\_\_\_\_

Notes \_\_\_\_\_

**Retrospective AE Review Form – CIF Data Review - July-December 2016**

Site name \_\_\_\_\_ Date \_\_\_\_\_ Site type:    Outreach    Mobile    Static

Reviewer \_\_\_\_\_ Month(s) of reviewed data \_\_\_\_\_ **CIF file numbers reviewed:** \_\_\_\_\_

Site team QA representative signature \_\_\_\_\_

| VMC procedure characteristics                                                                  | CIF reviewed (check if complete. Leave BLANK if incomplete or incorrect) |   |   |   |   |   |   |   |   |    |    |    |    |    |    |    |    |    |    |    |    |    |    |    |    |  |
|------------------------------------------------------------------------------------------------|--------------------------------------------------------------------------|---|---|---|---|---|---|---|---|----|----|----|----|----|----|----|----|----|----|----|----|----|----|----|----|--|
|                                                                                                | 1                                                                        | 2 | 3 | 4 | 5 | 6 | 7 | 8 | 9 | 10 | 11 | 12 | 13 | 14 | 15 | 16 | 17 | 18 | 19 | 20 | 21 | 22 | 23 | 24 | 25 |  |
| <b>CIF</b>                                                                                     |                                                                          |   |   |   |   |   |   |   |   |    |    |    |    |    |    |    |    |    |    |    |    |    |    |    |    |  |
| Adverse event section complete - Day of Procedure (severity + code)                            |                                                                          |   |   |   |   |   |   |   |   |    |    |    |    |    |    |    |    |    |    |    |    |    |    |    |    |  |
| 1 <sup>st</sup> post-procedure review AE section complete (Day 2 or Day 7) (severity + code)   |                                                                          |   |   |   |   |   |   |   |   |    |    |    |    |    |    |    |    |    |    |    |    |    |    |    |    |  |
| 2 <sup>nd</sup> post-procedure review AE section complete (Day 7 or Day 14) (severity + code)  |                                                                          |   |   |   |   |   |   |   |   |    |    |    |    |    |    |    |    |    |    |    |    |    |    |    |    |  |
| 3 <sup>rd</sup> post-procedure review AE section complete (Day 42 or Day 49) (severity + code) |                                                                          |   |   |   |   |   |   |   |   |    |    |    |    |    |    |    |    |    |    |    |    |    |    |    |    |  |
| Additional post-procedure review AE section complete (if applicable) (severity + code)         |                                                                          |   |   |   |   |   |   |   |   |    |    |    |    |    |    |    |    |    |    |    |    |    |    |    |    |  |
| Comments completed – if applicable                                                             |                                                                          |   |   |   |   |   |   |   |   |    |    |    |    |    |    |    |    |    |    |    |    |    |    |    |    |  |

**IN THE PAST 3 MONTHS:**

TOTAL NUMBER OF AEs IDENTIFIED FROM DATA: \_\_\_\_\_ TOTAL NUMBER OF AEs REPORTED ON MRF TO PARTNER: \_\_\_\_\_ TOTAL NUMBER OF AEs IN DHIS2: \_\_\_\_\_

Notes \_\_\_\_\_

**Retrospective AE Review Form – AE Log Review - July-December 2016**

Site name \_\_\_\_\_ Date \_\_\_\_\_ Site type:    Outreach    Mobile    Static

Reviewer \_\_\_\_\_ Month(s) of AE Log reviewed: \_\_\_\_\_

Site team QA representative signature \_\_\_\_\_

| VMNC procedure characteristics                                         | AE Log Month reviewed (check if complete. Leave BLANK if incomplete or incorrect) |   |   |   |   |   |   |   |   |    |    |    |    |    |    |    |    |    |    |    |    |    |    |    |    |  |
|------------------------------------------------------------------------|-----------------------------------------------------------------------------------|---|---|---|---|---|---|---|---|----|----|----|----|----|----|----|----|----|----|----|----|----|----|----|----|--|
|                                                                        | 1                                                                                 | 2 | 3 | 4 | 5 | 6 | 7 | 8 | 9 | 10 | 11 | 12 | 13 | 14 | 15 | 16 | 17 | 18 | 19 | 20 | 21 | 22 | 23 | 24 | 25 |  |
| <b>1. AE Log</b>                                                       |                                                                                   |   |   |   |   |   |   |   |   |    |    |    |    |    |    |    |    |    |    |    |    |    |    |    |    |  |
| Any AE reported?                                                       |                                                                                   |   |   |   |   |   |   |   |   |    |    |    |    |    |    |    |    |    |    |    |    |    |    |    |    |  |
| If yes, take photo of each report/line with client name/number covered |                                                                                   |   |   |   |   |   |   |   |   |    |    |    |    |    |    |    |    |    |    |    |    |    |    |    |    |  |
|                                                                        |                                                                                   |   |   |   |   |   |   |   |   |    |    |    |    |    |    |    |    |    |    |    |    |    |    |    |    |  |
|                                                                        |                                                                                   |   |   |   |   |   |   |   |   |    |    |    |    |    |    |    |    |    |    |    |    |    |    |    |    |  |

**IN THE PAST 3 MONTHS:**

TOTAL NUMBER OF AEs IDENTIFIED FROM DATA: \_\_\_\_\_ TOTAL NUMBER OF AEs REPORTED ON MFR TO PARTNER: \_\_\_\_\_ TOTAL NUMBER OF AEs IN DHIS2: \_\_\_\_\_

Notes \_\_\_\_\_  
 \_\_\_\_\_  
 \_\_\_\_\_

Details on AE on-site management

|                                                                                                                     |
|---------------------------------------------------------------------------------------------------------------------|
| 1. Who does AE documentation at your site?                                                                          |
| 2. What forms do you use to document AEs?                                                                           |
| 3. How do you report AEs at your facility and what are the reporting timelines?                                     |
| 4. Do you have challenges in reporting AEs?                                                                         |
| 5. Who reports/compiles/completes AEs on the MRFs?                                                                  |
| 6. Do you think the team has been picking up and reporting AEs. If not what may be the causes                       |
| 7. Does your site face challenges in doing reviews? Probe for transport, Staffing and AE review schedule challenges |
| 8. Can you describe your facility's AE review system?                                                               |
